# Supplementary material for: Whole-Genome Resequencing and Transcriptomic Analysis to Identify Genes Involved in Leaf-Color Diversity in Ornamental Rice Plants
Source: PubMed Central journal article supplement (PMC4405343; doi:10.1371/journal.pone.0124071), 2015-04-21
Supplement: pone.0124071.s008.pdf [file pone.0124071.s008.pdf]

Table S1. The statistics of de novo contig which was assembled with unmapped reads from each accession.

|                  | D052      | D056      | D101      | D120      | D122      | D128      | D131      | Hwangdo   | Jado   | Dongjin   | Average   |
|------------------|-----------|-----------|-----------|-----------|-----------|-----------|-----------|-----------|--------|-----------|-----------|
| No. contigs      | 400       | 367       | 458       | 402       | 386       | 473       | 445       | 1,814     | 6      | 329       | 508       |
| Total length, bp | 1,551,592 | 1,426,929 | 1,773,112 | 1,555,609 | 1,497,981 | 1,765,671 | 1,724,289 | 6,746,840 | 20,476 | 1,307,593 | 1,937,009 |
| N50, bp          | 4,147     | 4,115     | 4,079     | 4,178     | 4,104     | 4,000     | 4,134     | 3,891     | 2,882  | 4,200     | 3,973     |
| Max, bp          | 14,106    | 19,299    | 22,370    | 14,039    | 14,854    | 14,705    | 14,069    | 18,065    | 4,774  | 16,855    | 15,314    |
| Min, bp          | 2,007     | 2,005     | 2,005     | 2,000     | 2,004     | 2,000     | 2,000     | 2,000     | 2,582  | 2,000     | 2,060     |
