# Supplementary material for: Whole-Genome Resequencing and Transcriptomic Analysis to Identify Genes Involved in Leaf-Color Diversity in Ornamental Rice Plants
Source: PubMed Central journal article supplement (PMC4405343; doi:10.1371/journal.pone.0124071), 2015-04-21
Supplement: pone.0124071.s009.pdf [file pone.0124071.s009.pdf]

Table S2. Transcript variation of magnesium transporter related genes.

| Transcript              | Gene         | D052 | D056 | D101 | D120 | D122 | D128 | D131 | Hwangdo | Jado | Dongjin |
|-------------------------|--------------|------|------|------|------|------|------|------|---------|------|---------|
| LOC_Os01g64890.1        | Os01g0869200 | -    | -    | ×    | ×    | ×    | -    | ×    | -       | ×    | -       |
| LOC_Os01g68040.1        | Os01g0908500 | ×    | -    | ×    | ×    | ×    | ×    | -    | -       | ×    | -       |
| LOC_Os03g04480.1        | Os03g0137700 | ×    | ×    | ×    | ×    | ×    | -    | ×    | -       | ×    | -       |
| LOC_Os03g48000.1        | Os03g0684400 | ×    | -    | ×    | ×    | ×    | -    | -    | -       | ×    | ×       |
| LOC_Os03g48000.2        | "            | ×    | -    | ×    | ×    | ×    | -    | -    | -       | ×    | ×       |
| LOC_Os03g48000.3        | "            | ×    | -    | ×    | ×    | ×    | -    | -    | -       | ×    | ×       |
| LOC_Os03g53110.1        | Os03g0742400 | -    | ×    | ×    | ×    | ×    | ×    | -    | -       | ×    | -       |
| LOC_Os04g35160.1        | Os04g0430900 | -    | -    | ×    | -    | ×    | ×    | ×    | -       | -    | -       |
| LOC_Os04g42280.1        | Os04g0501100 | ×    | ×    | ×    | ×    | ×    | ×    | -    | -       | -    | ×       |
| LOC_Os06g44150.1        | Os06g0650800 | -    | ×    | -    | ×    | ×    | -    | ×    | ×       | ×    | ×       |
| LOC_Os10g39790.2        | Os10g0545000 | ×    | -    | -    | ×    | ×    | -    | -    | -       | -    | -       |
| LOC_Os10g39790.3        | "            | -    | -    | -    | -    | -    | -    | -    | -       | -    | -       |
| LOC_Os10g39790.4        | "            | -    | -    | -    | -    | -    | -    | -    | -       | -    | -       |
| Total (transcript/gene) |              | 6/4  | 9/5  | 4/2  | 3/1  | 2/0  | 9/5  | 9/5  | 12/8    | 5/3  | 8/6     |

"-" symbol (normal in the CDS region), "×" symbol (broken in the CDS region)
