# Supplementary material for: Whole-Genome Resequencing and Transcriptomic Analysis to Identify Genes Involved in Leaf-Color Diversity in Ornamental Rice Plants
Source: PubMed Central journal article supplement (PMC4405343; doi:10.1371/journal.pone.0124071), 2015-04-21
Supplement: pone.0124071.s010.pdf [file pone.0124071.s010.pdf]

Table S3. Transcript variation of sulfur transporter related genes.

| Transcript              | Gene         | D052 | D056 | D101  | D120 | D122 | D128  | D131 | Hwangdo | Jado | Dongjin |
|-------------------------|--------------|------|------|-------|------|------|-------|------|---------|------|---------|
| LOC_Os01g41050.1        | Os01g0593700 | -    | -    | -     | ×    | ×    | -     | ×    | -       | ×    | ×       |
| LOC_Os01g45830.1        | Os01g0645900 | -    | -    | -     | ×    | ×    | -     | ×    | -       | -    | -       |
| LOC_Os01g52130.1        | Os01g0719300 | ×    | ×    | ×     | -    | -    | -     | -    | ×       | ×    | -       |
| LOC_Os03g06520.1        | Os03g0161200 | ×    | -    | ×     | ×    | -    | -     | ×    | -       | ×    | -       |
| LOC_Os03g06520.2        | "            | ×    | -    | ×     | -    | -    | -     | -    | -       | ×    | -       |
| LOC_Os03g09930.1        | Os03g0195300 | -    | -    | -     | -    | -    | -     | -    | ×       | ×    | -       |
| LOC_Os03g09930.2        | "            | -    | -    | -     | -    | -    | -     | -    | -       | -    | -       |
| LOC_Os03g09940.1        | Os03g0195450 | -    | ×    | -     | -    | ×    | ×     | -    | ×       | ×    | -       |
| LOC_Os03g09970.1        | Os03g0195800 | ×    | ×    | -     | ×    | ×    | ×     | ×    | ×       | -    | -       |
| LOC_Os03g09970.2        | "            | ×    | ×    | -     | ×    | ×    | ×     | ×    | ×       | -    | -       |
| LOC_Os03g09970.3        | "            | ×    | ×    | -     | ×    | ×    | ×     | ×    | ×       | -    | -       |
| LOC_Os03g09970.4        | "            | ×    | ×    | -     | ×    | ×    | ×     | ×    | ×       | -    | -       |
| LOC_Os03g09980.1        | Os03g0196000 | -    | -    | -     | -    | -    | -     | ×    | ×       | -    | -       |
| LOC_Os04g55800.1        | Os04g0652400 | ×    | ×    | -     | ×    | ×    | -     | ×    | ×       | -    | -       |
| LOC_Os06g05160.1        | Os06g0143700 | ×    | -    | ×     | ×    | ×    | ×     | -    | -       | ×    | -       |
| LOC_Os08g01120.1        | Os08g0101500 | -    | -    | -     | -    | -    | -     | -    | ×       | -    | -       |
| LOC_Os08g31410.1        | Os08g0406150 | -    | -    | -     | -    | -    | -     | -    | ×       | -    | -       |
| LOC_Os08g31410.2        | "            | -    | -    | -     | -    | -    | -     | -    | ×       | -    | -       |
| LOC_Os08g31410.3        | "            | -    | -    | -     | -    | -    | -     | -    | ×       | -    | -       |
| LOC_Os08g31410.4        | "            | -    | -    | -     | -    | -    | -     | -    | ×       | -    | -       |
| LOC_Os08g31410.5        | "            | -    | -    | -     | -    | -    | -     | -    | ×       | -    | -       |
| LOC_Os08g31410.6        | "            | -    | -    | -     | -    | -    | -     | -    | ×       | -    | -       |
| LOC_Os08g31410.7        | "            | -    | -    | -     | -    | -    | -     | -    | ×       | -    | -       |
| LOC_Os09g06499.1        | Os09g0240500 | -    | -    | ×     | ×    | -    | ×     | ×    | ×       | ×    | ×       |
| LOC_Os09g06499.2        | "            | -    | -    | ×     | ×    | -    | ×     | ×    | ×       | ×    | ×       |
| LOC_Os10g28440.1        | Os10g0420400 | -    | ×    | -     | -    | -    | -     | -    | ×       | -    | -       |
| Total (transcript/gene) |              | 17/9 | 18/9 | 20/10 | 15/7 | 17/8 | 18/10 | 15/7 | 6/4     | 17/7 | 23/12   |

"-" symbol (normal in the CDS region), "×" symbol (broken in the CDS region)
