# Supplementary material for: Whole-Genome Resequencing and Transcriptomic Analysis to Identify Genes Involved in Leaf-Color Diversity in Ornamental Rice Plants
Source: PubMed Central journal article supplement (PMC4405343; doi:10.1371/journal.pone.0124071), 2015-04-21
Supplement: pone.0124071.s011.pdf [file pone.0124071.s011.pdf]

Table S4. Expression value of anthocyanin biosynthesis related genes at three developmental stages in the 10 accessions.

| Cultivars | L_Os07g32020 | L_Os01g44260 | L_Os01g27490 | L_Os03g15360 | L_Os04g53850 | L_Os04g53920 |
|-----------|--------------|--------------|--------------|--------------|--------------|--------------|
| Hwangdo_1 | 0.296        | 0            | 0            | 0            | 0.499        | 0            |
| Hwangdo_2 | 0.327        | 0            | 0            | 0            | 0.072        | 0            |
| Hwangdo_3 | 0.148        | 0            | 0            | 0.094        | 0.779        | 0            |
| Jado_1    | 114.5        | 308.9        | 621.0        | 0            | 11.662       | 1.712        |
| Jado_2    | 162.1        | 394.2        | 1180.8       | 0            | 0.898        | 0.7          |
| Jado_3    | 38.0         | 72.8         | 198.2        | 0            | 1.945        | 0.651        |
| Dongjin_1 | 5.081        | 0.08         | 0.058        | 0            | 1.511        | 0            |
| Dongjin_2 | 4.088        | 0            | 0.069        | 0            | 0.537        | 0            |
| Dongjin_3 | 3.074        | 0.136        | 0.275        | 0            | 0.789        | 0            |
| D052_1    | 36.753       | 0            | 0.224        | 0            | 0.874        | 1.111        |
| D052_2    | 3.007        | 0.172        | 0            | 0            | 0.337        | 1.322        |
| D052_3    | 0.614        | 0            | 0.059        | 0            | 2.802        | 0.694        |
| D056_1    | 3.223        | 0            | 0            | 0            | 2.54         | 0.282        |
| D056_2    | 2.153        | 0            | 0.105        | 0            | 0.858        | 0.962        |
| D056_3    | 0.767        | 0            | 0            | 0            | 4.01         | 0.402        |
| D101_1    | 14.108       | 123.1        | 89.3         | 0            | 0.474        | 2.183        |
| D101_2    | 8.512        | 62.0         | 51.9         | 0            | 0.503        | 1.352        |
| D101_3    | 0.077        | 0            | 0            | 0            | 0.742        | 0.525        |
| D120_1    | 4.952        | 0            | 0            | 0            | 5.004        | 0.754        |
| D120_2    | 7.708        | 0            | 0            | 0.118        | 2.855        | 0.486        |
| D120_3    | 0.807        | 0            | 0.057        | 0            | 20.886       | 0.177        |
| D122_1    | 12.194       | 0            | 0.108        | 0.11         | 4.999        | 0.185        |
| D122_2    | 17.864       | 0            | 0.122        | 0            | 1.155        | 0.893        |
| D122_3    | 6.029        | 0            | 0            | 0.217        | 11.564       | 0.094        |
| D128_1    | 5.156        | 0            | 0            | 0            | 0.992        | 0.725        |
| D128_2    | 3.972        | 0            | 0.066        | 0            | 0.345        | 1.793        |
| D128_3    | 0.809        | 0            | 0.106        | 0            | 5.807        | 0.796        |
| D131_1    | 13.218       | 0            | 0            | 0            | 1.494        | 0.42         |
| D131_2    | 4.366        | 0            | 0.061        | 0            | 0.741        | 1.224        |
| D131_3    | 0.701        | 0            | 0            | 0            | 2.424        | 0.752        |
