# Supplementary material for: Whole-Genome Resequencing and Transcriptomic Analysis to Identify Genes Involved in Leaf-Color Diversity in Ornamental Rice Plants
Source: PubMed Central journal article supplement (PMC4405343; doi:10.1371/journal.pone.0124071), 2015-04-21
Supplement: pone.0124071.s012.pdf [file pone.0124071.s012.pdf]

Table S5. The statistics of gap information from two transcripts as *LOC\_Os02g09220* and *LOC\_Os01g16040*.

| Transcripts    | Cultivars | Chromosome | Gap position |           | Average depth |       | Length | Coverage |
|----------------|-----------|------------|--------------|-----------|---------------|-------|--------|----------|
|                |           |            | Start        | End       | 5'            | 3'    |        |          |
| LOC_Os02g09220 | D052      | Chr2       | 4,740,780    | 4,740,792 | 23.65         | 39.08 | 13     | 3.15     |
|                | D120      | Chr2       | 4,740,778    | 4,740,809 | 21.48         | 31.94 | 32     | 2.66     |
|                | D122      | Chr2       | 4,740,346    | 4,740,538 | 35.1          | 24.49 | 193    | 3.04     |
|                | D122      | Chr2       | 4,740,541    | 4,740,615 | 27.21         | 27.61 | 75     | 2.56     |
|                | D128      | Chr2       | 4,740,333    | 4,740,486 | 38.5          | 24.05 | 154    | 2.24     |
|                | D131      | Chr2       | 4,740,420    | 4,740,444 | 26.11         | 20.05 | 25     | 4        |
|                | D131      | Chr2       | 4,740,450    | 4,740,454 | 24.79         | 20.42 | 5      | 4        |
|                | D131      | Chr2       | 4,740,484    | 4,740,486 | 23.23         | 21.68 | 3      | 4        |
|                | D131      | Chr2       | 4,740,503    | 4,740,539 | 22.44         | 23.67 | 37     | 3.76     |
|                | D131      | Chr2       | 4,740,556    | 4,740,570 | 20.45         | 24.85 | 15     | 4        |
|                | Jado      | Chr2       | 4,740,546    | 4,740,594 | 20.3          | 20.68 | 49     | 2.94     |
| LOC_Os01g16040 | D052      | Chr1       | 9,028,411    | 9,028,601 | 58.29         | 21.84 | 191    | 1.51     |
|                | D052      | Chr1       | 9,028,700    | 9,028,702 | 38.68         | 24.57 | 3      | 4        |
|                | D120      | Chr1       | 9,028,399    | 9,028,630 | 49.44         | 20.02 | 232    | 2.32     |
